# Supplementary material for: Cationic-exchange approach for conversion of two dimensional CdS to two dimensional Ag2S nanowires with an intermediate core–shell nanostructure towards supercapacitor application
Source: Royal Society of Chemistry journal article supplement (doi:10.1039/c6nj02411d), 2016-01-01
Supplement: c6nj02411d1.pdf [file c6nj02411d1.pdf]

Electronic Supplementary Material (ESI) for New Journal of Chemistry, October 5, 2016.

### Supporting Information

## Cationic –exchange approach for conversion of two dimensional CdS to two dimensional Ag<sub>2</sub>S nanowires with intermediate core-shell nanostructure towards supercapacitor application

Nikila Nair<sup>a</sup>, Babasaheb R. Sankpal<sup>a\*</sup>

<sup>a</sup>Nano Materials and Device Laboratory, Department of Applied Physics, Visvesvaraya National Institute of Technology, South Ambazari Road, Nagpur-440010 (M.S) India.

New Journal of Chemistry, October 5, 2016

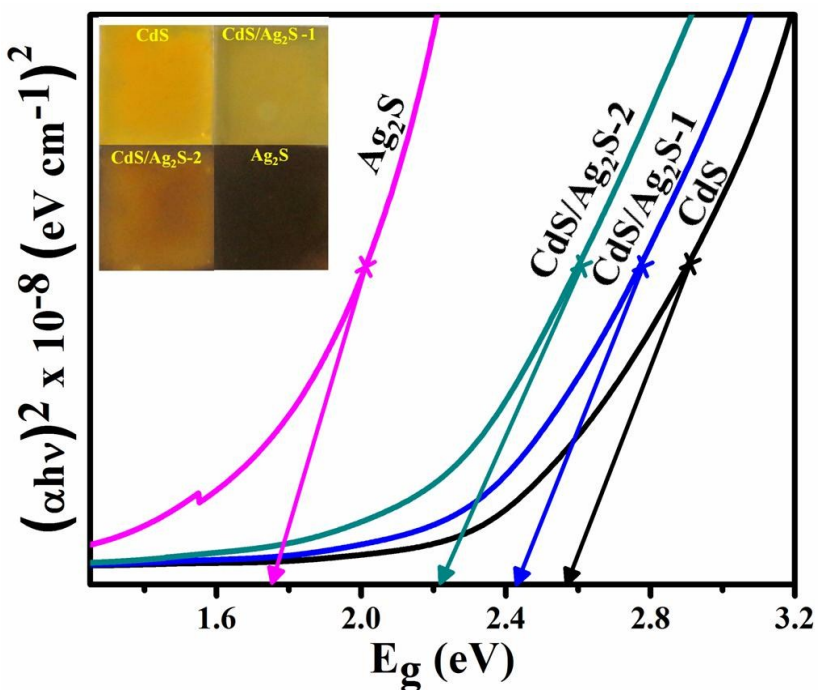

**Figure S1** Plot of  $(\alpha h\nu)^2$  vs. photon energy  $h\nu$  of CdS, CdS/Ag<sub>2</sub>S-1, CdS/Ag<sub>2</sub>S-2 and Ag<sub>2</sub>S

Figure S1 shows the band gap ( $E_g$ ) of CdS, CdS/Ag<sub>2</sub>S-1, CdS/Ag<sub>2</sub>S-2 and Ag<sub>2</sub>S samples. The value of  $E_g$  was obtained by extrapolating the straight portion of the line towards the X-axis. The  $E_g$  for CdS is reported to be 2.42 eV while for Ag<sub>2</sub>S is ~ 1.7 eV [1-3]. In our case  $E_g$  seems to drift from 2.57 eV for CdS to 1.74 eV for Ag<sub>2</sub>S, which implies that the NWs behave within quantum confined regime and it is a slow process [4].

#### References:

- [1] A. I. Kryukov, A. L. Stroyuk, N. N. Zin'chuk, A. V. Korzhak and S. Ya. Kuchmii, J. *Mol.Catal A: Chem.*, 2004, **221**, 209–221.
- [2] B. R. Sankapal, R.S. Mane and C.D. Lokhande, *Mater. Chem. Phys.*, 2000, **63**, 226±229.
- [3] L. Dloczik and R.Koenenkamp, *J. Solid State Eletrochem*, 2004, **8**, 142–146.
- [4] L. Lin, Y. Wen, Y. Liang, N. Zhang and D. Xiao, *Anal. Methods*, 2013, **5**, 457-464.
